1 **Dead infant carrying by chimpanzee mothers in the Budongo Forest**

2

3 Adrian Soldati<sup>1,2,3</sup>, Pawel Fedurek<sup>3,4,5</sup>, Catherine Crockford<sup>4</sup>, Sam Adue<sup>3</sup>, John Walter

4 Akankwasa<sup>3</sup>, Caroline Asiimwe<sup>3</sup>, Jackson Asua<sup>3</sup>, Gideon Atayo<sup>3</sup>, Boscou Chandia<sup>3</sup>, Elodie

5 Freyemann<sup>3,6</sup>, Caroline Fryns<sup>2,3</sup>, Geresomu Muhumuza<sup>3</sup>, Derry Taylor<sup>1,3</sup>, Klaus

6 Zuberbühler<sup>1,2,3</sup>, Catherine Hobaiter<sup>1,3</sup>

7

8 Affiliations:

9 <sup>1</sup> School of Psychology and Neuroscience, University of St Andrews, St Andrews, UK

10 <sup>2</sup> Department of Comparative Cognition, Institute of Biology, University of Neuchâtel,

11 Neuchâtel, Switzerland

12 <sup>3</sup> Budongo Conservation Field Station, Masindi, Uganda

13 <sup>4</sup> Department of Primatology, Max Planck Institute for Evolutionary Anthropology, Leipzig,

14 Germany

15 <sup>5</sup> Division of Psychology, Faculty of Natural Sciences, University of Stirling, Stirling, UK

16 <sup>6</sup> Department of Anthropology and Museum Ethnography, University of Oxford, Oxford, UK

17

18 Email of corresponding author: [as391@st-andrews.ac.uk](mailto:as391@st-andrews.ac.uk)

19

20 **ABSTRACT**

21 It has been suggested that non-human primates (hereafter primates) can respond to deceased

22 conspecifics in ways that suggest they experience psychological states not unlike humans,

23 which would indicate they exhibit some notion of death. Here, we report long-term

24 demographic data from two East African chimpanzee groups. During a combined 40-year

25 observation period we recorded 191 births of which around a third died in infancy, mostly

26 within the first year. We documented the post-mortem behaviour of the mothers and found  
27 that Budongo chimpanzee mothers routinely carried deceased infants after their death,  
28 usually until the body started to decompose after a few days. However, we also observed  
29 three cases of extended carrying lasting for more than 2-weeks, one of which was followed  
30 by the unusual extended carrying of a substitute object and another which lasted three  
31 months. In each case, the corpses mummified. We discuss these data in view of functional  
32 hypotheses of dead infant carrying in primates and the potential proximate mechanisms  
33 involved in this behaviour, including psychological processes managing infant loss in  
34 humans such as grieving.

35

## 36 INTRODUCTION

37 Primate thanatology, the study of the behaviour and underlying physiological and  
38 psychological factors associated with dead or dying individuals in non-human primates  
39 (hereafter primates), continues to raise important questions about human uniqueness  
40 (Anderson 2016, 2018; Anderson et al. 2018). Humans experiencing the loss of socially close  
41 individuals experience significant psychological trauma with long-term physiological effects,  
42 including symptoms of post-traumatic stress disorder, anxiety and depression, and increased  
43 used of health-care resources (Figley et al. 1997; Parkes et al. 1997; Lannen et al. 2008).  
44 Given our biological and social similarities, other primate species – in particular other great  
45 apes – may experience similar cognitive and physiological changes. Cross-species  
46 comparisons, especially in primates, are often used to reveal past evolutionary trajectories of  
47 the hominid lineage. Primate behaviour and physiology in relation to deceased individuals  
48 provide valuable data to better understand the origins of why humans are so powerfully  
49 affected by death. More generally, primate responses to death may provide further insight

50 into other aspects of animal cognition, such as animacy or the perception of time (Gonçalves  
51 and Carvalho 2019).

52

53 Because death is unpredictable and rarely observed in wild primate communities, the  
54 available datasets are usually anecdotal and descriptions of events are often incomplete  
55 (Watson and Matsuzawa 2018; Ramsay and Teichroeb 2019). Nevertheless, an increasing  
56 number of primate groups have been habituated to human observers (Kappeler et al. 2012),  
57 which has led to more frequent reporting and more systematic efforts to extract patterns of  
58 behaviour in responses to death (Anderson 2020). These observations have led to claims that  
59 primates respond to death in ways that are similar to humans, by producing strong emotional,  
60 social, and exploratory responses (Watson and Matsuzawa 2018; Gonçalves and Carvalho  
61 2019). Among non-human animals, the emphasis on primates may result from easier  
62 detection, given the relatively large number of long-term studies, and observations from  
63 corvid, elephant, and cetacean species suggest that some understanding of death may be  
64 widespread among a wide range of long-lived highly-social species (Reggente et al. 2016;  
65 Gonçalves and Biro 2018; Bercovitch 2020).

66

67 Here, we focus on a particularly remarkable behaviour seen in many primates, dead infant  
68 carrying by mothers, which in chimpanzees typically occurs for a period of up to three days  
69 (Gonçalves and Carvalho 2019). Dead infant carrying (also referred as infant corpse carrying)  
70 is the most frequently reported thanatological behaviour and shows substantial variation in  
71 accompanying behaviours across primate species (Fernández-Fueyo et al. 2021), as a result, it  
72 offers rich data against which to explore possible explanatory factors. This behaviour has not  
73 only been reported in chimpanzees (Matsuzawa 1997; Hosaka et al. 2000; Kooriyama 2009;  
74 Biro et al. 2010) but also in bonobos (Fowler and Hohmann 2010; Tokuyama et al. 2017),

75 gorillas (Warren and Williamson 2004; Masi 2020), chacma baboons (Carter et al. 2020), red  
76 colobus (Georgiev et al. 2019), geladas (Fashing et al. 2011), bonnet and lion-tailed  
77 macaques (Das et al. 2019), Japanese macaques (Sugiyama et al. 2009; Takeshita et al. 2020),  
78 and vervet monkeys (Botting and van de Waal 2020), while failed apparent attempts at  
79 carrying have been observed in ring-tailed lemurs (Nakamichi et al. 1996) and marmosets  
80 (Thompson et al. 2020). Several hypotheses have been put forward to explain the function of  
81 and motivation for this behaviour (Table 2; for a review see: Watson and Matsuzawa 2018;  
82 Gonçalves and Carvalho 2019).

83

84 Within an increasingly large field of hypotheses – some of which are mutually non-exclusive  
85 – there are some natural groupings based on similarity in the suggested mechanisms or  
86 explanations. A first group of hypotheses presumes that primate mothers are unable to  
87 understand the ramifications of death and their behavioural responses are simply side effects  
88 of evolved physiological mechanisms. Specifically, the ‘unawareness hypothesis’ states that  
89 mothers are unable to discriminate between temporarily unresponsive and irreversibly  
90 deceased individuals and simply try to avoid the costs of premature abandonment (Hrdy  
91 1999). The hypothesis predicts that mothers are unable to understand their infants’ state and  
92 continue providing maternal care (e.g. grooming) and try to elicit responsiveness (e.g.  
93 poking, smelling). With increasing time, the ambiguity will dissolve due to the accelerating  
94 decomposition of the corpse, which is usually mediated by local climate. A second prediction  
95 therefore is that dry and particularly hot or cold conditions favouring mummification should  
96 favour prolonged carrying of dead infants (see also ‘climate hypothesis’: Matsuzawa 1997;  
97 Fashing et al. 2011). The ‘post-parturient condition’ hypothesis (also referred as ‘hormonal’,  
98 see Gonçalves and Carvalho 2019) similarly proposes that the maternal physiological  
99 conditions associated with pregnancy and birth favour persistent care of the dead infant as

100 long as the mother is lactating or until resumption of ovulation (Biro et al. 2010), for example  
101 indicated by sexual swelling (Kaplan 1973). After giving birth, the endocrine system of the  
102 mother releases hormones (e.g. oxytocin) that stimulate maternal behaviours (Keverne 1988;  
103 Bercovitch 2020). Here, the younger the infant at time of death the longer the carrying  
104 period.

105

106 A second kind of hypotheses assumes that primate mothers can have a notion of death,  
107 provided they have relevant personal experience. Specifically, the ‘learning about death’  
108 hypothesis states that chimpanzees do not intuitively understand death but can acquire the  
109 notion by learning to attend to the relevant cues (Cronin et al. 2011). Here, the predication is  
110 that experienced mothers will be aware of the irreversible change and, unlike first-time  
111 mothers, should have shorter dead-infant carrying periods. An alternative hypothesis, the  
112 ‘grief-management hypothesis’, also assumes that chimpanzees possess a notion of death, and  
113 suggests dead-infant carrying represents a consoling strategy to cope with grief. This  
114 hypothesis predicts that mothers who are able to carry their dead infants experience lower  
115 levels of ‘stress’ hormones (i.e. glucocorticoids) than mothers who could not or did not carry  
116 them (Nicolson 1991). A recent study by Girard-Buttoz and colleagues (Girard-Buttoz et al.  
117 2021) reported elevated cortisol levels in infant chimpanzees who lost their mothers,  
118 supporting the notion that disruption of the mother-infant bond leads to elevated stress.  
119 Similarly, female baboons experience high levels of glucocorticoids when losing an ally to  
120 predation and in periods of infanticidal attacks (Engh et al. 2006a, b). Dead infant carrying,  
121 therefore, could be a strategy to cope with stress associated with infant loss.

122

123 A third group of hypotheses are agnostic about whether chimpanzees possess a notion of  
124 death but proposes various adaptive mechanisms that favour post-mortem mothering

125 behaviour. First, the ‘learning-to-mother hypothesis’ states that dead-infant carrying  
126 improves maternal skills (Warren and Williamson 2004), predicting that the behaviour should  
127 mainly be observed in inexperienced primiparous females. Second, the ‘maternal-bond  
128 strength hypothesis’ predicts that mothers with older infants share a stronger bond and are  
129 thus more likely to show extensive carrying as compared to mothers with younger infants  
130 (Watson and Matsuzawa 2018).

131

132 The existence of multiple – sometime contrasting – hypotheses is likely a reflection of the  
133 small and highly variable data available and the diversity of potential drivers of this  
134 behaviour across different species. A recent systematic study on primates (n=18 species)  
135 showed that duration of infant carrying is affected by the age of the mother, with older  
136 mothers carrying for longer periods (Das et al. 2019), in contrast with previous findings by  
137 Sugiyama and colleagues who found no effect of age (Sugiyama et al., 2009). Infants that  
138 died of sickness were carried for longer than those who were stillborn or victims of  
139 infanticide, while the age of the infant did not influence duration of carrying (Das et al.  
140 2019). Although dead infant carrying is a shared but rare behaviour in primates, carrying  
141 duration seems to be the longest in great apes (Fernández-Fueyo et al. 2021), particularly in  
142 chimpanzees (Das et al. 2019). Wild chimpanzees have higher levels of infant mortality  
143 compared to captive conspecifics (Courtenay and Santow 1989; Hill et al. 2001), which  
144 provides increased opportunities to observe mothers’ responses to their infants’ death  
145 (Watson and Matsuzawa 2018). Chimpanzee mothers typically carry their dead infants for a  
146 few days, though a recent analysis of the largest chimpanzee dataset (n=33 cases) did not  
147 provide clear support for any of the previous hypotheses (Lonsdorf et al. 2020). Despite this,  
148 it was proposed that the ‘unawareness hypothesis’ is unlikely because of the presence of  
149 atypical carrying postures and sensory cues after death compared to those displayed towards

150 alive infants (Lonsdorf et al. 2020). More recently, a study using the largest primate database  
151 to date (n=409 cases and n=50 species) found that dead infant carrying was more likely to  
152 occur when the cause of death was non-traumatic and when mothers were younger  
153 (Fernández-Fueyo et al. 2021). Here, we revisit the discussion on the potential reasons behind  
154 dead infant carrying by female chimpanzees with a 40-year dataset of two study groups of the  
155 Budongo Forest, Uganda, including three detailed observations of extended dead infant  
156 carrying by two different females.

157

## 158 METHODS

### 159 **Study site and subjects**

160 The Budongo Forest Reserve is a semi-deciduous tropical rain forest located along the  
161 Western Rift Valley in Uganda. This reserve is made of 793 km<sup>2</sup> of protected forest and  
162 grassland, including 482 km<sup>2</sup> of continuous forest cover (Eggeling 1947) . The reserve  
163 contains a population of approximated 600 East African chimpanzees (*Pan troglodytes*  
164 *schweinfurthii*). Our observations took place in two adjacent communities, Sonso and  
165 Waibira, studied regularly by researchers and followed on a daily basis by field assistants  
166 since 1990 and 2011 respectively (Reynolds 2005; Samuni et al. 2014).

167

168 At the time of the events, the Waibira community contained an estimated 120 individuals, 96  
169 of which could be individually recognised. Individuals involved in the first event were Keti  
170 (KET), a 20-year old adult primiparous female (estimated birth 1998) and her 2-year old  
171 female infant Karyo (KYO) born in December 2015. The Sonso community contained 65  
172 named individuals, in addition to three unnamed females in the process of immigrating. The  
173 individuals involved in the event were Upesi (UP), a 21-year old parous female (estimated  
174 birth 1999) and a) in the second event, her recently born unnamed unsexed infant UP3, born

175 mid-September 2020 and b) in the third event, her 4<sup>th</sup> born unnamed unsexed infant UP4,  
176 estimated birth 7<sup>th</sup> August 2021. Her first two infants (born in 2017 and 2018) were victims  
177 of within-community infanticide before reaching a month old (see Leroux et al. 2021 for one  
178 reported case).

179

180 In this paragraph we consider the scope for bias in our study subjects by using the  
181 STRANGE framework to report potential sampling biases in our study (Webster and Rutz  
182 2020; Rutz and Webster 2021). The Sonso community are of typical size whereas the  
183 Waibira community are particularly large as compared to that of other chimpanzees (in a  
184 recent comparison of 18 groups across three subspecies: *P.t. schweinfurthii*, *P.t. troglodytes*,  
185 *P.t. verus*; communities range from 7-144 individuals with a mean 42; within these data the  
186 East African sub-species (*P.t. schweinfurthii*) range is 18-144 with a median 49; Wilson et al.  
187 2014). Sonso have a typical female-biased sex ratio among mature individuals (M:F; 1:1.7),  
188 whereas the Waibira community have more unusual evenly-balanced sex ratio among mature  
189 individuals (M:F; 1:1.2; mean among 9 *P.t. schweinfurthii* communities 1:1.7; Wilson et al.  
190 2014). Of relevance to sampling biases in infant mortality and opportunities to carry dead  
191 infants, the Sonso community experience high levels of infanticide (Lowe et al. 2019, 2020).  
192 A medium altitude rainforest (~1100m) with significant annual rainfall (~1500mm per year)  
193 the area is slightly more seasonal than true rainforest with a distinct dry-season during  
194 December-March and a drier season during June-August (Newton-Fisher 1999).

195

#### 196 **Ethical note**

197 Data collection was observational and adhered to the International Primatological Society's  
198 Code of Best Practice for Field Primatology (MacKinnon et al. 2014). All applicable  
199 international, national, and institutional guidelines for the care of animals were followed.



200 Research was conducted under approval by the Uganda Wildlife Authority and the Uganda  
201 National Council for Science and Technology. All work was in accordance with the ethical  
202 standards of the Budongo Conservation Field Station at which the study was conducted.

203

#### 204 **Data collection**

205 Researchers and a team of field assistants followed chimpanzees daily (Waibira: from 06:00  
206 to 18:00; Sonso: from 07:00 to 16:30). Long-term data collection included continuous focal  
207 individual activity and party composition taken on a 15-min scan basis. In addition, all  
208 unusual events or otherwise remarkable behaviour were recorded in detail in logbooks for  
209 each community, including births, deaths, and associated descriptions of behaviour (Sonso:  
210 since 1993; Waibira: since 2011).

211

212 In addition to long-term records, AS, PF, EF, CF, DT and CH together with field-assistants  
213 SA, JA, GA, BC, and GM of the Budongo Conservation Field Station observed the extended  
214 carry events we report. KET and UP are typically comfortable with the presence of human  
215 observers; however, following the death of KETs infant we avoided selecting her as a focal  
216 individual because we observed apparent signs of greater than typical arousal (e.g. self-  
217 scratching and vigilance) in her interactions with other chimpanzees and we did not want our  
218 extended presence to further impact these. Observations of her behaviour were taken on an ad  
219 libitum basis whenever she joined the party of chimpanzees that included a focal individual,  
220 but we made an effort to locate and observe her for a brief period of time each day to obtain  
221 regular updates on her and her infant's state of decomposition. During the births and deaths  
222 of UP's infants, regular research practices had been adjusted due to the Covid19 pandemic. In  
223 2020 activities were restricted to shorter hours of observation (7:30 to 13:00) and limited to  
224 CH and the permanent field staff, who focused primarily on health monitoring of the

225 chimpanzees during this period; in late 2021, at the time of UP's second extended infant  
226 carry, restricted research activities had resumed. Researchers and field staff opportunistically  
227 noted any unusual behaviour exhibited. Particular attention was given to how the bodies, and  
228 in one event a potential substitute object, were transported, the response of nearby individuals  
229 to the mother or the carcass, the interactions of the mother with the corpse, and the state of  
230 the corpse. We were not able to collect physiological samples from either corpse to perform  
231 laboratory analyses on the cause of death, nor we were able to retrieve either body for  
232 autopsy.

233

## 234 RESULTS

235 Over a combined 40-year period of observations (30 years Sonso, 10 years Waibira) a total of  
236 191 births were recorded. Of these: 68 (36%) died in infancy ( $\leq 5$  years) offering  
237 opportunities for their mothers to carry the infant's corpse post-mortem. We found no  
238 evidence for seasonality as deaths (with a confirmed observation month,  $n=59$ ) occurred  
239 throughout the year (Jan  $n=5$ ; Feb  $n=2$ ; Mar  $n=2$ ; April  $n=3$ ; May  $n=1$ ; Jun  $n=3$ ; Jul  $n=9$ ; Aug  
240  $n=6$ ; Sep  $n=10$ ; Oct  $n=6$ ; Nov  $n=9$ ; Dec  $n=3$ ). Of the  $n=68$  infant deaths, we excluded  $n=3$   
241 that died together with their mothers and  $n=12$  because they were partially dismembered or  
242 cannibalised during infanticides. Of the remaining  $n=53$  cases, we were able to estimate the  
243 infant's age at death ( $\pm 1$  month) in  $n=46$  cases (87%). The majority ( $n=25$ ; 54%) died within  
244 the first month,  $n=17$  (37%) at 1-month to 1-year old;  $n=3$  (7%) at 1- to 3-years old, and  $n=1$   
245 (2%) at 3- to 5-years old.

246

247 We observed  $n=12$  carries of dead infants by their mothers (Table 1), 23% of observed  
248 opportunities ( $n=53$ ). To be included as a case of dead infant carrying we required that the  
249 mother be seen with the infant the day after death was estimated to have occurred. In 9 cases

250 the minimum carry length observed was 1-3 days, in 3 cases we observed a longer minimum  
 251 carry of n=18, n=56, and n= 89 days. These are described in more detail below. The 12  
 252 carries occurred in both primiparous (n=1) and multi-parous females (n=11), including a 7<sup>th</sup>  
 253 born infant. However, these observations are likely an under-estimate of the frequency of  
 254 dead infant carrying behaviour in Budongo mothers. In n=36 the mother reappeared alone  
 255 and could have carried for an unknown period prior to this. In total there were n=29 cases  
 256 where the mother and dead infant were seen together, of these n=12 included a death with the  
 257 mother or infanticide with cannibalism. Of the remaining 17 cases, n=12 showed carrying of  
 258 the dead-infant, a rate of 71%. Of the five cases where the mother was observed with the  
 259 dead infant but did not carry it, all were infanticides.

260

261 **Table 1** Carrying of dead infants by Budongo chimpanzee mothers: mother-infant dyads  
 262 (with the mother first), mother's age, parity (indicated as multi-parous (multi) or primi-  
 263 parous (primi)), infant's age, cause of death, duration of carrying

| Mother-infant | Age mother (years) | Parity | Age infant (months) | Cause of death                   | Minimum carrying duration (days) |
|---------------|--------------------|--------|---------------------|----------------------------------|----------------------------------|
| KG-KG2        | 21 ±3              | multi  | 0.03                | still birth (suspected)          | 2                                |
| ML-ML2        | 26 ±3              | multi  | 0.03                | still birth (suspected)          | 1                                |
| JN-JN2        | 21 ±1              | multi  | 0.5                 | unknown                          | 1                                |
| ZM-ZM6        | 41 ±5              | multi  | 0.4                 | unknown                          | 1                                |
| JN-JN4        | 28 ±1              | multi  | 0.25                | infanticide                      | 3                                |
| KU-KU5        | 34 ±3              | multi  | 0.1                 | infanticide (suspected)          | 2                                |
| KL-KL7        | 34 ±1              | multi  | 0.12                | infanticide                      | 2                                |
| ML-ML5        | 39 ±5              | multi  | 0.06                | infanticide (suspected)          | 3                                |
| KET-KYO       | 20 ±1              | primi  | 25                  | respiratory infection (inferred) | 18                               |

---

|        |            |       |      |         |    |
|--------|------------|-------|------|---------|----|
| KU-KU7 | 40 $\pm$ 3 | multi | 0.15 | unknown | 2  |
| UP-UP3 | 21 $\pm$ 1 | multi | 0.25 | unknown | 56 |
| UP-UP4 | 22 $\pm$ 1 | multi | 0.25 | unknown | 89 |

---

264

265 **Extended dead infant carrying**

266 A detailed description and videos of the observations are available in the Supplementary

267 Materials. Here we provide a summary of the key information.

268

269 **Observation 1: KET, extended dead infant carrying in Waibira**

270 KET's first born infant KYO was last seen alive on the 6<sup>th</sup> of January 2018, aged 25 months.

271 On the 7<sup>th</sup> of January 2018 KET was observed carrying KYO who appeared lifeless. Other

272 chimpanzees were present and were apparently aware of her arrival with the infant but

273 showed no atypical reactions to KET or the corpse. The likely cause of death was inferred to

274 be respiratory infection. During the first day KET was observed scratching herself repeatedly

275 before approaching a water area and when sitting close to a sub-adult male. These scratches

276 appeared to be a sign of arousal (fast and repeated, and not accompanied by grooming or

277 response waiting). On several occasions she moved her hand over the dead body apparently

278 to chase away the flies. Other than this, during the entire 18-day period, she was never

279 observed to provide any direct maternal care (grooming, inspecting, touching, or peering)

280 other than carrying, and regularly left the body at short distances (up to 5m) without visually

281 monitoring it. She did not stop others from approaching herself or the dead infant. When

282 moving or feeding in a tree, the dead body was usually (15 out of 16 observations) placed in

283 her right leg pocket, when on the ground she carried the body in her hand or arm (see Online

284 Resources). On one occasion a nulliparous young adult female (MON) was observed to

285 briefly carry the corpse in one hand while KET followed her. Across the 18-days KYO's

286 corpse decomposed, initially increasing in smell. By the 4<sup>th</sup> day, no hair remained on the  
287 body. By the 9<sup>th</sup> day, the body looked “dried”. By the 10<sup>th</sup> day the pungent smell and number  
288 of flies decreased. It is likely that at this stage the body was completely mummified. No other  
289 chimpanzees responded noticeably to either the smell or the flies. On the last day of observed  
290 carrying, the body was still intact with only eyes missing and one deformed ear.

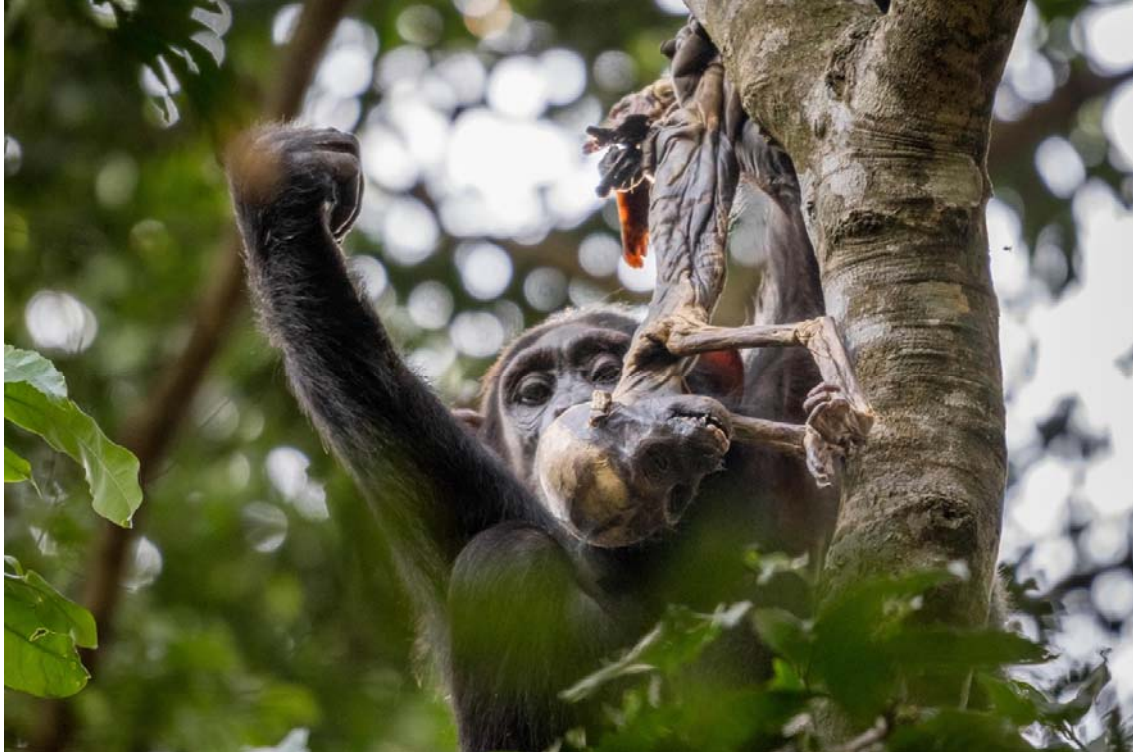

291  
292 **Fig. 1** KET holding KYO’s mummified body while sitting on a tree (picture taken by AS on  
293 the 21.01.2018)

294

295 **Observation 2: UP, extended dead infant and substitute object carrying in Sonso**

296 UP was first seen on the 25<sup>th</sup> September 2020 with an apparently recently dead infant (UP3),  
297 estimated to be 1-week old. Her two previous infants were killed by intra-community  
298 infanticide when under 2-weeks old. While some immature individuals (< 10 years old)  
299 inspected the carcass, no others did, and an adult male showed no interest even while  
300 grooming UP. The infant’s corpse had started to dry out, but had a noticeable smell and flies,

301 and was assumed to have died several days earlier. UP was observed on the 4<sup>th</sup> and 26<sup>th</sup> of  
302 October and the 8<sup>th</sup> and 19<sup>th</sup> of November, carrying the corpse on all occasions. She held it in  
303 her hand when on the ground and moved it to a leg pocket when climbing or moving in trees.  
304 By the 8<sup>th</sup> November the corpse appeared fully mummified. UP was last seen with the corpse  
305 on the 19<sup>th</sup> November, a minimum carry duration of 56-days (although likely several days  
306 longer given corpse appeared partially dry on first observation). She was next seen on the  
307 23<sup>rd</sup> November. When approaching a water hole at the base of a tree, she carried a twig  
308 ~50cm long in her mouth. As she reached the hole she transferred the twig to her hand and  
309 left leg pocket, drank, and then returned it to her mouth (see Online Resources). She  
310 continued to carry the twig throughout the morning, including while climbing large trees, and  
311 when patrolling with the group over several kilometres. She was seen on the 24<sup>th</sup> November,  
312 and 3<sup>rd</sup> and 4<sup>th</sup> December, and was again observed to be carrying a similar twig consistently.  
313 She was not seen to put it down on the ground. She was seen briefly on the 5<sup>th</sup> December, but  
314 it was not clear if she had a twig with her, and when she was next observed in the new year  
315 (30<sup>th</sup> January) she no longer carried anything.

316

317 **Observation 3: UP, 2<sup>nd</sup> extended dead infant carrying in Sonso**

318 UP was first seen on the 28<sup>th</sup> August 2021 with another dead infant (UP4), estimated to be 1-  
319 week old. The infant's corpse had started to dry out but had a strong smell and on the 30<sup>th</sup> of  
320 August flies could be seen hovering around it. Given that the corpse still had a strong smell  
321 but was already partially dried, it was assumed to have died at least one week prior. The  
322 cause of death was unclear; however, UP was observed with wounds on her head and on her  
323 left arm. UP was observed using three main carrying styles when traveling on the ground or  
324 moving in trees. She either carried the corpse in one hand (typically left one), in the mouth,  
325 or in one leg pocket (typically left one) (see Online Resources). When resting, she placed the

326 corpse on her lap, in a leg pocket, held it in one hand, or placed it on the ground close to her.  
327 UP was not observed providing direct maternal care (e.g. grooming, inspecting, or peering) to  
328 the corpse, though she was observed moving her hand around the dead body to chase away  
329 flies on several occasions. On one instance UP was victim of aggression from other females  
330 during which she dropped the corpse, and then followed the group when traveling and left the  
331 corpse behind. Soon after, she was observed returning to retrieve the corpse. We observed a  
332 juvenile male orphan (KJ) following her and peering close to the corpse on a few occasions.  
333 No other individual was observed taking interest in or showing response to the corpse.  
334 Throughout the observation period, UP was often seen in large groups and regularly  
335 socialising with adult males (e.g. grooming). On this occasion there were no observations of  
336 object carrying. UP was seen carrying the corpse on: the 28<sup>th</sup>, 30<sup>th</sup> and 31<sup>st</sup> of August; the 2<sup>nd</sup>,  
337 6<sup>th</sup>, 8<sup>th</sup>, 9<sup>th</sup>, 11<sup>th</sup>, 13<sup>th</sup>, 14<sup>th</sup>, 16<sup>th</sup>, 18<sup>th</sup>-23<sup>rd</sup>, 24<sup>th</sup>, 25<sup>th</sup> and 29<sup>th</sup> of September; the 7<sup>th</sup>, 12<sup>th</sup>, 13<sup>th</sup>,  
338 15<sup>th</sup>-21<sup>st</sup>, 26<sup>th</sup>, 28<sup>th</sup> of October; and the 3<sup>rd</sup>, 10<sup>th</sup>, 14<sup>th</sup> and 17<sup>th</sup> of November. On the 18<sup>th</sup> of  
339 November she was seen without the corpse and had resumed her sexual cycle (with visible  
340 sexual swelling) for the first time since the last pregnancy.

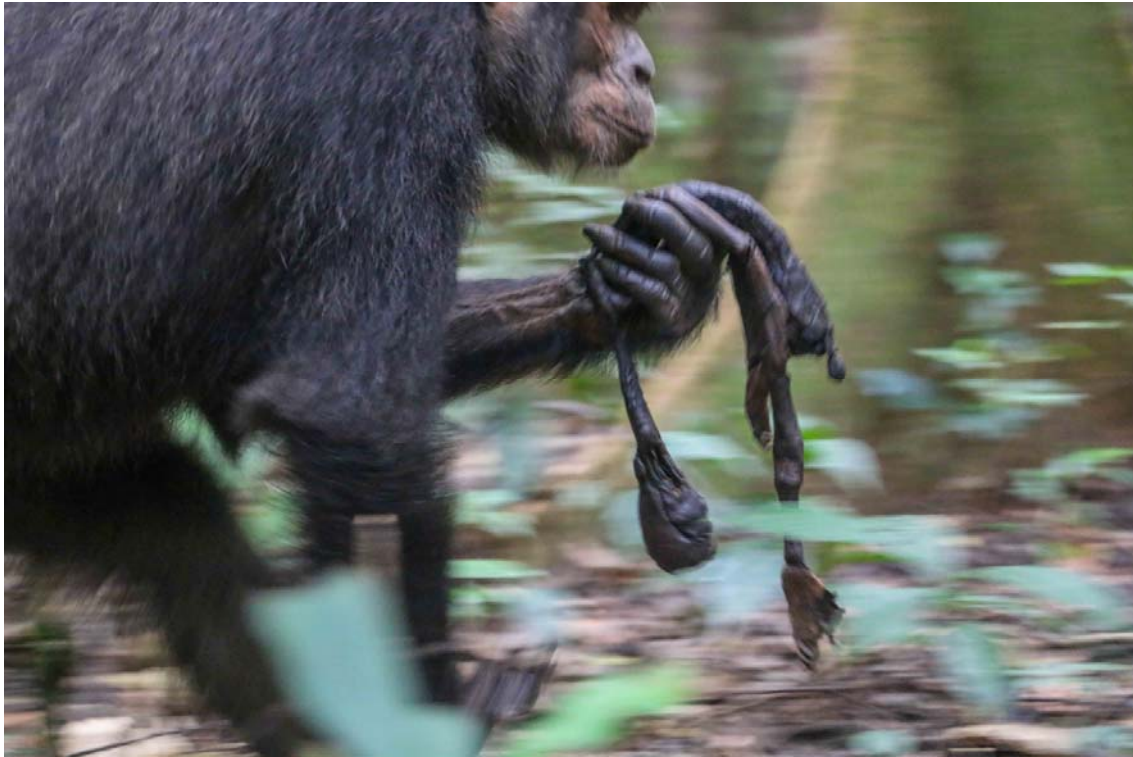

341

342 **Fig. 2** UP carrying UP4's mummified body in her hand while traveling on the ground

343 (picture taken by EF on the 30.08.2021)

344

345 DISCUSSION

346 Human responses to deceased conspecifics are remarkable. Despite the fact that dead  
347 individuals have lost all biological importance in terms of kinship, reproduction, or  
348 cooperation, humans do not immediately abandon their dead but exhibit a plethora of post-  
349 mortem social behaviour towards them, including social gatherings, physical tending, and  
350 various burial practices (Parkes et al. 1997). These activities can last for days but are  
351 typically terminated by the onset of physical decay, though certain cultures continue to  
352 interact with the deceased afterwards (e.g. Hollan 1995). There is archaeological evidence  
353 that tending the dead evolved before modern humans (Martínón-Torres et al. 2021), with  
354 burials now documented in *Homo sapiens neanderthalensis* (Rendu et al. 2014) and *Homo*



355 *naledi* (Dirks et al. 2015), and interpreted as an indication of some abstract notion of death  
356 and understanding of irreversible loss (Pettitt 2018).

357

358 What do great apes experience, cognitively and emotionally, when losing a socially close  
359 individual? In this study we compiled long-term data on chimpanzee mothers that had lost  
360 their infants but continued carrying them for days, raising questions about evolutionary  
361 continuity in the function of this behaviour and the cognition of understanding death. Dead-  
362 infant carrying was practiced by both parous and primiparous mothers with both new-born  
363 and older infants. It occurred in at least a fifth, but more likely in almost three quarters of  
364 cases (if we consider only those cases in which we were able to observe the mother  
365 immediately after the infant's death). As compared to other chimpanzee communities even  
366 this value may be an under-estimate of the frequency with which bereaved female  
367 chimpanzees carry their infants. The Sonso community, in which we made most of our  
368 observations, experiences periodic high levels of infanticide (Lowe et al. 2020). These  
369 infanticide cases are often accompanied by some level of cannibalism or dismemberment,  
370 and/or the infant is taken from the mother (Lowe et al. 2019), which may limit or shorten  
371 mothers' opportunities to carry (Gonçalves and Carvalho 2019; Fernández-Fueyo et al.  
372 2021).

373

374 We found no seasonal or infant age effect on dead infant carrying. We also reported three  
375 prolonged cases of extended infant carrying. Our observations suggest that these mothers,  
376 despite the evidence of irreversible loss including absence of any resemblance to living  
377 infants, continued to experience a strong attachment to their deceased infants. Neither female  
378 had any other living offspring and one, after eventually abandoning her dead infant after 56  
379 days, replaced the corpse with a twig, which she carried for at least another two weeks. In our

380 cases dead-infant carrying was not accompanied by other forms of maternal care, such as  
381 grooming or other forms of maternal attention or interactions, which sometimes occurs very  
382 early after an infant's death (Matsuzawa 1997; Biro 2011), suggesting that the two mothers  
383 had become aware of the biological facts. Both mothers were forced to use atypical modes of  
384 infant carrying, including mouth carrying, more typically used for objects (Lonsdorf et al.  
385 2020), as live infants cling to the back or belly of their mothers during travel. Also relevant is  
386 that, unlike other groups of animals, chimpanzees do not often cannibalise their own dead  
387 infants (but see Fedurek et al. 2020 for two exceptions). Overall, these data suggest that the  
388 'unawareness hypothesis' is an unlikely explanation of chimpanzee behaviour towards dead  
389 conspecifics.

390

391 As neither mother appeared to inspect or interact with the infant beyond carrying, our  
392 observations do not support the 'learning about death' hypothesis, although maternal social  
393 behaviour has been seen in other chimpanzee mothers during the initial stages after death  
394 (Matsuzawa 1997; Biro et al. 2010). Similarly, we did not find general support for the  
395 'learning to mother hypothesis'. While both KET and UP were inexperienced mothers  
396 (primiparous or parous but all offspring killed at under a month old), 10 of the 11 mothers  
397 who carried their dead infants were parous and two of these cases were with 6<sup>th</sup> and 7<sup>th</sup> born  
398 infants. Cases of extended carrying by parous mothers in other groups also suggest limited  
399 support the 'learning to mother hypothesis' (Matsuzawa 1997; Biro et al. 2010; Biro 2011;  
400 Lonsdorf et al. 2020). However, in line with the fact that younger mothers carry dead infants  
401 for longer (Fernández-Fueyo et al. 2021), our observations would fit a suggestion that rare  
402 instances of particularly extended carrying across several months might occur when mothers  
403 have limited mothering experience.

404

405 Because we did not collect any hormonal data to assess the levels of stress associated with  
406 dead infant carrying, we were unable to evaluate the ‘grief-management hypothesis’.

407 However, the fact that elevated glucocorticoid levels have been reported in chimpanzees and  
408 baboons following the death of a socially important group member strongly suggests that  
409 these would also be present for chimpanzee mothers in these instances given that the bond  
410 they share with their infants is among their most significant, with typically 3-5 years before  
411 weaning, and often up to 10-years of daily close contact (Pusey 1983; Lonsdorf and Ross  
412 2012; Stanton et al. 2017).

413

414 Our observations provide more mixed support for other hypotheses. One observation took  
415 place during the peak of the driest season of the year, whereas the other two took place  
416 during the wettest season of the year. Thus, rather than mummification being the result of  
417 favourable climactic conditions, it is possible mummification was observed because the  
418 extended carrying durations allowed for it. Recent explorations of several large datasets also  
419 found no support for the ‘climate hypothesis’ (Das et al. 2019; Lonsdorf et al. 2020;  
420 Fernández-Fueyo et al. 2021). The evidence for the ‘post-parturient condition hypothesis’ is  
421 similarly mixed; of the three extended carries two infants were new-born, while the other was  
422 2-years old. The longest carry reported was for a new-born; however, other new-born infants  
423 were carried for short periods of just a few days. One of the three extended carries terminated  
424 with the resumption of the mother’s reproductive cycles. Our data do not provide  
425 straightforward support for the ‘post parturient hypothesis’ – the extended carrying by UP of  
426 her two young new-borns would fit this pattern; however, the extended carrying by KET of  
427 her 2-year old infant does not. Other observations of non-mothers carrying dead infants  
428 suggest that the post parturient hypothesis cannot explain observed extended carrying alone  
429 (Watson and Matsuzawa 2018; Masi 2020). However, hormonal data (that could potentially

430 also show abnormal hormonal production in either of the two females) are needed to  
431 investigate this hypothesis effectively. While the same argument may apply to the ‘maternal-  
432 bond strength hypothesis’, with KET’s case providing support and UP’s cases providing  
433 counterevidence, it may be worth noting that these were UP’s third and fourth infants in a  
434 five-year period, the first two having been killed at under a month old in within-community  
435 infanticides (one suspected, one confirmed). As a result, it may be difficult to assess the  
436 nature of her bond with these infants. Her apparent use of a ‘substitute’ in her carrying of a  
437 twig together with the even more prolonged second carry suggest she had a particularly  
438 strong motivation to carry. These observations, combined with the fact that all recorded  
439 instances of carrying in our dataset concern infants who died before weaning age, indicate  
440 that maternal behaviours, which are not limited to maternal care, likely play an important role  
441 in dead infant carrying (Fernández-Fueyo et al. 2021).

442

443 **Table 2** Hypotheses, predictions, and supporting evidence from the present study for dead  
444 infant carrying

| Hypothesis             | Prediction                                                           | Study support |
|------------------------|----------------------------------------------------------------------|---------------|
| Unawareness            | Dead infants are treated as alive.                                   | Unlikely      |
| Post-parturition       | Young infants are carried for longer.                                | Mixed         |
| Learning about death   | Mothers inspect and check state of infant.                           | Unlikely      |
| Grief-management       | Stress levels are lower in mothers carrying dead infants.            | Not tested    |
| Learning-to-mother     | Primiparous mothers carry dead infants more often/for longer.        | Unlikely      |
| Maternal-bond strength | Strongly bonded and intermediate/old infants are carried for longer. | Mixed         |

445

446

447 Within the detailed observations of longer carries, there were two examples of particularly  
448 rare behaviour: KET allowing MON to carry KYO, and UP's stick carrying. Carrying the  
449 infant of others over periods of time longer than one day is an extremely unusual behaviour  
450 in primates, though it has been observed on two occasions in Budongo: adult males snatched  
451 new born infants and carried them still alive for at least two days (in one case the male  
452 continued to carry the infant for a further two days after its death; Notman and Munn 2003;  
453 unpublished long-term data) and was suspected in another case where a daughter was  
454 observed carrying her mother's new infant for several days without the mother being present  
455 (unpublished long-term data). It is possible that KET tolerated MON's behaviour because of  
456 a close bond the two shared, another explanation is that her own bond with the infant's body  
457 apparently had decreased by the 13<sup>th</sup> day.

458

459 We are not aware of any other reports of primate mothers carrying substitute objects  
460 following their infant's death and we are cautious about interpreting this observation.  
461 Chimpanzees may carry objects, including twigs, for many reasons; however, a number of  
462 features suggest that this was related to UP's infant carrying. Prior to the incident, neither UP  
463 nor any other adult Budongo chimpanzees had ever been observed to carry non-food objects  
464 between locations. They are notoriously non-stick-tool users (Whiten et al. 1999; Gruber et  
465 al. 2011), with a substantial literature suggesting that this is both absent, and robust to  
466 scaffolding of its acquisition (Gruber et al. 2009; Gruber 2016). Chimpanzees have been  
467 reported at several sites to engage in 'doll' play, where substitute objects, including logs and  
468 sticks, are carried as if they were a young infant (Matsuzawa 1997; Kahlenberg and  
469 Wrangham 2010). This behaviour typically peaks in juveniles and is more frequent in  
470 females and while it is observed in some adult females it ceased once they became mothers  
471 (Kahlenberg and Wrangham 2010). The description of log doll use in Bossou is of particular

472 interest here, as it was carried by a juvenile female during the period that her mother was  
473 carrying her sick infant sister, who subsequently died and whose body was also then carried  
474 (Matsuzawa 1997). UP's behaviour was observed multiple times over several weeks. Unlike  
475 the descriptions of other 'dolls' she was not seen to play with or interact with the object,  
476 treating it instead in the same way as she had her infant's corpse. Thus, in addition to object-  
477 carrying being associated with the absence of infants in nulliparous mothers, it may also be  
478 associated with the loss of an infant in bereaved chimpanzee mothers. In humans, the use of  
479 transitional objects has been suggested to function as a coping mechanism for grief following  
480 a bereavement (Graham et al. 1987; Lister et al. 2008). A similar suggestion has been made  
481 for beluga whales where both wild (Smith and Sleno 1986) and captive (Kilborn 1994),  
482 individuals have been seen to carry inanimate objects, apparently as 'surrogates'. The captive  
483 whale carried a buoy followed the the removal of her dead calf immediately after birth  
484 (Kilborn 1994), and in the wild observations included carrying of planks and netting (Smith  
485 and Sleno 1986).

486

487 To sum up, our observations are consistent with previous observations that chimpanzee  
488 mothers respond to the death of their infants with carrying behaviour across communities.  
489 Furthermore, our observations support the argument that these mothers act as if they are  
490 aware of the loss but are continuing to display a strong attachment to the bodies of their  
491 infants and may be affected by psychological processes akin to human grieving.  
492 Nevertheless, more detailed hormonal data are needed for a test of this potential mechanism.  
493 A combination of ecological conditions favouring mummification, and social factors, such as  
494 the strong bond shared between mothers and their infants, may explain the three particularly  
495 extended carries by Budongo chimpanzees. While we did not observe other indications of  
496 maternal care in these cases, we are cautious about interpreting this as a wider absence in

497 Budongo mothers. Mothers' pattern of behavioural responses to death may be individually  
498 specific and nuanced, resulting from a combination of physical, ecological, and psychological  
499 factors, and many more observations are needed to generalise at the population or species  
500 level. Our interpretations are limited by the small dataset and the large number of competing  
501 and non-mutually exclusive hypotheses, and we encourage researchers and long-term field  
502 sites to continue to report the rare behaviours observed in different populations, for example  
503 by contributing to open-access databases such as 'ThanatoBase'  
504 (<http://thanatobase.mystrikingly.com>), to allow a richer exploration and more robust  
505 hypothesis testing of non-human primates' reaction to death.

506

#### 507 *Acknowledgments*

508 We are grateful to all field assistants of the Sonso and Waibira communities who provided  
509 essential assistance throughout the observation period. We are thankful to the management,  
510 staff, and researchers of the Budongo Conservation Field Station for their support and thank  
511 the project's founder Vernon Reynolds. We thank the Royal Zoological Society of Scotland  
512 for their long-term financial support to the field station. We thank the Uganda Wildlife  
513 Authority and the Uganda National Council for Science and Technology for permission to  
514 work in Uganda. We also thank André Gonçalves for helpful comments on a previous version  
515 of the draft. AS's fieldwork was supported by the European Research Council project grant to  
516 CC (grant agreement number: 679787). CH is supported by funding from the European  
517 Union's 8th Framework Programme, Horizon 2020 (grant agreement number: 802719).

518

#### 519 REFERENCES

520 Anderson JR (2016) Comparative thanatology. *Curr Biol* 26:R553–R556.

521 <https://doi.org/10.1016/j.cub.2015.11.010>

- 522 Anderson JR (2018) Chimpanzees and death. *Phil Trans R Soc B* 373:20170257.  
523 <https://doi.org/10.1098/rstb.2017.0257>
- 524 Anderson JR (2020) Responses to death and dying: primates and other mammals. *Primates*  
525 61:1–7. <https://doi.org/10.1007/s10329-019-00786-1>
- 526 Anderson JR, Biro D, Pettitt P (2018) Evolutionary thanatology. *Phil Trans R Soc B*  
527 373:20170262. <https://doi.org/10.1098/rstb.2017.0262>
- 528 Bercovitch FB (2020) A comparative perspective on the evolution of mammalian reactions to  
529 dead conspecifics. *Primates* 61:21–28. <https://doi.org/10.1007/s10329-019-00722-3>
- 530 Biro D (2011) Chimpanzee Mothers Carry the Mummified Remains of Their Dead Infants:  
531 Three Case Reports from Bossou. In: Matsuzawa T, Humle T, Sugiyama Y (eds) *The*  
532 *Chimpanzees of Bossou and Nimba*. Springer Japan, Tokyo, pp 241–250
- 533 Biro D, Humle T, Koops K, et al (2010) Chimpanzee mothers at Bossou, Guinea carry the  
534 mummified remains of their dead infants. *Curr Biol* 20:R351–R352.  
535 <https://doi.org/10.1016/j.cub.2010.02.031>
- 536 Botting J, van de Waal E (2020) Reactions to infant death by wild vervet monkeys  
537 (*Chlorocebus pygerythrus*) in KwaZulu-Natal, South Africa: prolonged carrying, non-  
538 mother carrying, and partial maternal cannibalism. *Primates* 61:751–756.  
539 <https://doi.org/10.1007/s10329-020-00851-0>
- 540 Carter AJ, Baniel A, Cowlshaw G, Huchard E (2020) Baboon thanatology: responses of  
541 filial and non-filial group members to infants' corpses. *R Soc open sci* 7:192206.  
542 <https://doi.org/10.1098/rsos.192206>
- 543 Courtenay J, Santow G (1989) Mortality of wild and captive chimpanzees. *Folia Primatol*  
544 52:167–177



- 545 Cronin KA, van Leeuwen EJC, Mulenga IC, Bodamer MD (2011) Behavioral response of a  
546 chimpanzee mother toward her dead infant. *Am J Primatol* 73:415–421.  
547 <https://doi.org/10.1002/ajp.20927>
- 548 Das S, Erinjery JJ, Desai N, et al (2019) Deceased-infant carrying in nonhuman anthropoids:  
549 Insights from systematic analysis and case studies of bonnet macaques (*Macaca radiata*)  
550 and lion-tailed macaques (*Macaca silenus*). *J Comp Psych* 133:156–170.  
551 <https://doi.org/10.1037/com0000140>
- 552 Dirks PH, Berger LR, Roberts EM, et al (2015) Geological and taphonomic context for the  
553 new hominin species *Homo naledi* from the Dinaledi Chamber, South Africa. *Elife*  
554 4:e09561
- 555 Eggeling WJ (1947) Observations on the Ecology of the Budongo Rain Forest, Uganda. *J*  
556 *Ecol* 34:20–87. <https://doi.org/10.2307/2256760>
- 557 Engh AL, Beehner JC, Bergman TJ, et al (2006a) Behavioural and hormonal responses to  
558 predation in female chacma baboons (*Papio hamadryas ursinus*). *Proc R Soc B* 273:707–  
559 712. <https://doi.org/10.1098/rspb.2005.3378>
- 560 Engh AL, Beehner JC, Bergman TJ, et al (2006b) Female hierarchy instability, male  
561 immigration and infanticide increase glucocorticoid levels in female chacma baboons.  
562 *Anim Behav* 71:1227–1237. <https://doi.org/10.1016/j.anbehav.2005.11.009>
- 563 Fashing PJ, Nguyen N, Barry TS, et al (2011) Death among geladas (*Theropithecus gelada*):  
564 a broader perspective on mummified infants and primate thanatology. *Am J Primatol*  
565 73:405–409. <https://doi.org/10.1002/ajp.20902>
- 566 Fedurek P, Tkaczynski P, Asiimwe C, et al (2020) Maternal cannibalism in two populations  
567 of wild chimpanzees. *Primates* 61:181–187. <https://doi.org/10.1007/s10329-019-00765-6>

- 568 Fernández-Fueyo E, Sugiyama Y, Matsui T, Carter AJ (2021) Why do some primate mothers  
569 carry their infant's corpse? A cross-species comparative study. *Proc R Soc B* 288:1–10.  
570 <https://doi.org/10.1098/rspb.2021.0590>
- 571 Figley CR, Bride BE, Mazza N (1997) *Death and trauma: The traumatology of grieving*.  
572 Taylor & Francis
- 573 Fowler A, Hohmann G (2010) Cannibalism in wild bonobos (*Pan paniscus*) at Lui Kotale.  
574 *Am J Primatol* 72:509–514. <https://doi.org/10.1002/ajp.20802>
- 575 Georgiev AV, Melvin ZE, Warketin A-S, et al (2019) Two Cases of Dead-Infant Carrying by  
576 Female Zanzibar Red Colobus (*Piliocolobus kirkii*) at Jozani-Chwaka Bay National Park,  
577 Zanzibar. *Afr Primates* 13:57–60
- 578 Girard-Buttoz C, Tkaczynski PJ, Samuni L, et al (2021) Early maternal loss leads to short-  
579 but not long-term effects on diurnal cortisol slopes in wild chimpanzees. *Elife* 10:e64134.  
580 <https://doi.org/10.7554/eLife.64134>
- 581 Gonçalves A, Biro D (2018) Comparative thanatology, an integrative approach: exploring  
582 sensory/cognitive aspects of death recognition in vertebrates and invertebrates. *Phil Trans*  
583 *R Soc B* 373:20170263. <https://doi.org/10.1098/rstb.2017.0263>
- 584 Gonçalves A, Carvalho S (2019) Death among primates: a critical review of non-human  
585 primate interactions towards their dead and dying. *Biol Rev* 94:1502–1529.  
586 <https://doi.org/10.1111/brv.12512>
- 587 Graham MA, Thompson SC, Estrada M, Yonekura ML (1987) Factors affecting  
588 psychological adjustment to a fetal death. *American Journal of Obstetrics and*  
589 *Gynecology* 157:254–257. [https://doi.org/10.1016/S0002-9378\(87\)80145-X](https://doi.org/10.1016/S0002-9378(87)80145-X)
- 590 Gruber T (2016) Great Apes Do Not Learn Novel Tool Use Easily: Conservatism, Functional  
591 Fixedness, or Cultural Influence? *Int J Primatol* 37:296–316.  
592 <https://doi.org/10.1007/s10764-016-9902-4>

- 593 Gruber T, Muller MN, Reynolds V, et al (2011) Community-specific evaluation of tool  
594 affordances in wild chimpanzees. *Sci Rep* 1:128. <https://doi.org/10.1038/srep00128>
- 595 Gruber T, Muller MN, Strimling P, et al (2009) Wild Chimpanzees Rely on Cultural  
596 Knowledge to Solve an Experimental Honey Acquisition Task. *Curr Biol* 19:1806–1810.  
597 <https://doi.org/10.1016/j.cub.2009.08.060>
- 598 Hill K, Boesch C, Goodall J, et al (2001) Mortality rates among wild chimpanzees. *J Hum*  
599 *Evol* 40:437–450. <https://doi.org/10.1006/jhev.2001.0469>
- 600 Hollan D (1995) To the Afterworld and Back: Mourning and Dreams of the Dead among the  
601 Toraja. *Ethos* 23:424–436. <https://doi.org/10.1525/eth.1995.23.4.02a00030>
- 602 Hosaka K, Matsumoto-Oda A, Huffman MA, Kawanaka K (2000) Reactions to dead bodies  
603 of conspecifics by wild chimpanzees in the Mahale Mountains, Tanzania. *Primate Res*  
604 16:1–15
- 605 Hrdy SB (1999) *Mother Nature: Ruthless Competitive Nurturing and Tender: Maternal*  
606 *Instincts & the Shaping of the Species*
- 607 Kahlenberg SM, Wrangham RW (2010) Sex differences in chimpanzees' use of sticks as play  
608 objects resemble those of children. *Curr Biol* 20:R1067–R1068.  
609 <https://doi.org/10.1016/j.cub.2010.11.024>
- 610 Kaplan J (1973) Responses of mother squirrel monkeys to dead infants. *Primates* 14:89–91.  
611 <https://doi.org/10.1007/BF01730518>
- 612 Kappeler PM, van Schaik CP, Watts DP (2012) The Values and Challenges of Long-Term  
613 Field Studies. In: Kappeler PM, Watts DP (eds) *Long-Term Field Studies of Primates*.  
614 Springer Berlin Heidelberg, Berlin, Heidelberg, pp 3–18
- 615 Keverne EB (1988) Central mechanisms underlying the neural and neuroendocrine  
616 determinants of maternal behaviour. *Psychoneuroendocrinology* 13:127–141.  
617 [https://doi.org/10.1016/0306-4530\(88\)90010-8](https://doi.org/10.1016/0306-4530(88)90010-8)

- 618 Kilborn SS (1994) Object Carrying in a Captive Beluga Whale (*delphinapterus Leucas*) as  
619 Possible Surrogate Behavior. *Mar Mamm Sci* 10:496–501.  
620 <https://doi.org/10.1111/j.1748-7692.1994.tb00510.x>
- 621 Kooriyama T (2009) The death of a newborn chimpanzee at Mahale: reactions of its mother  
622 and other individuals to the body. *Pan Afr News* 16:19–21
- 623 Lannen PK, Wolfe J, Prigerson HG, et al (2008) Unresolved Grief in a National Sample of  
624 Bereaved Parents: Impaired Mental and Physical Health 4 to 9 Years Later. *JCO*  
625 26:5870–5876. <https://doi.org/10.1200/JCO.2007.14.6738>
- 626 Leroux M, Monday G, Chandia B, et al (2021) First observation of a chimpanzee with  
627 albinism in the wild: Social interactions and subsequent infanticide. *Am J Primatol*.  
628 <https://doi.org/10.1002/ajp.23305>
- 629 Lister S, Pushkar D, Connolly K (2008) Current bereavement theory: Implications for art  
630 therapy practice. *Arts Psychother* 35:245–250. <https://doi.org/10.1016/j.aip.2008.06.006>
- 631 Lonsdorf EV, Ross SR (2012) Socialization and Development of Behavior. In: *The Evolution*  
632 *of Primate Societies*. University of Chicago Press, pp 245–268
- 633 Lonsdorf EV, Wilson ML, Boehm E, et al (2020) Why chimpanzees carry dead infants: an  
634 empirical assessment of existing hypotheses. *R Soc open sci* 7:200931.  
635 <https://doi.org/10.1098/rsos.200931>
- 636 Lowe AE, Hobaiter C, Asiimwe C, et al (2020) Intra-community infanticide in wild, eastern  
637 chimpanzees: a 24-year review. *Primates* 61:69–82. [https://doi.org/10.1007/s10329-019-](https://doi.org/10.1007/s10329-019-00730-3)  
638 [00730-3](https://doi.org/10.1007/s10329-019-00730-3)
- 639 Lowe AE, Hobaiter C, Newton-Fisher NE (2019) Countering infanticide: Chimpanzee  
640 mothers are sensitive to the relative risks posed by males on differing rank trajectories.  
641 *Am J Phys Anthropol* 168:3–9. <https://doi.org/10.1002/ajpa.23723>

- 642 MacKinnon KC, Riley EP, Garber PA, et al (2014) Code of Best Practices for Field  
643 Primatology. <https://doi.org/10.13140/2.1.2889.1847>
- 644 Martín-Torres M, d’Errico F, Santos E, et al (2021) Earliest known human burial in Africa.  
645 Nature 593:95–100. <https://doi.org/10.1038/s41586-021-03457-8>
- 646 Masi S (2020) Reaction to allospecific death and to an unanimated gorilla infant in wild  
647 western gorillas: insights into death recognition and prolonged maternal carrying.  
648 Primates 61:83–92. <https://doi.org/10.1007/s10329-019-00745-w>
- 649 Matsuzawa T (1997) The death of an infant chimpanzee at Bossou, Guinea. Pan Afr News  
650 4:4–6. <https://doi.org/10.5134/143350>
- 651 Nakamichi M, Koyama N, Jolly A (1996) Maternal responses to dead and dying infants in  
652 wild troops of ring-tailed lemurs at the Berenty Reserve, Madagascar. Int J Primatol  
653 17:505–523. <https://doi.org/10.1007/BF02735189>
- 654 Newton-Fisher NE (1999) The diet of chimpanzees in the Budongo Forest Reserve, Uganda:  
655 Diet of Budongo chimpanzees. Afr J Ecol 37:344–354. <https://doi.org/10.1046/j.1365-2028.1999.00186.x>
- 657 Nicolson NA (1991) Maternal behavior in human and nonhuman primates. In: Understanding  
658 behavior: What primate studies tell us about human behavior. Oxford Univ. Press NY, pp  
659 17–50
- 660 Notman H, Munn J (2003) A Case of Infant Carrying by an Adult Male Chimpanzee in the  
661 Budongo Forest. Pan Afr News 10:7–9
- 662 Parkes CM, Langani P, Young B, Speck PW (1997) Death and bereavement across cultures.  
663 London: Routledge. Palliat Med 11:427–427
- 664 Pettitt P (2018) Hominin evolutionary thanatology from the mortuary to funerary realm: the  
665 palaeoanthropological bridge between chemistry and culture. Phil Trans R Soc B  
666 373:20180212. <https://doi.org/10.1098/rstb.2018.0212>

- 667 Pusey AE (1983) Mother-offspring relationships in chimpanzees after weaning. *Anim Behav*  
668 31:363–377. [https://doi.org/10.1016/S0003-3472\(83\)80055-4](https://doi.org/10.1016/S0003-3472(83)80055-4)
- 669 Ramsay MS, Teichroeb JA (2019) Anecdotes in Primatology: Temporal Trends,  
670 Anthropocentrism, and Hierarchies of Knowledge. *Am Anthropol* 121:680–693.  
671 <https://doi.org/10.1111/aman.13295>
- 672 Reggente MAL, Alves F, Nicolau C, et al (2016) Nurturant behavior toward dead  
673 conspecifics in free-ranging mammals: new records for odontocetes and a general  
674 review. *Journal of Mammalogy* 97:1428–1434. <https://doi.org/10.1093/jmammal/gyw089>
- 675 Rendu W, Beauval C, Crevecoeur I, et al (2014) Evidence supporting an intentional  
676 Neandertal burial at La Chapelle-aux-Saints. *Proc Natl Acad Sci USA* 111:81–86.  
677 <https://doi.org/10.1073/pnas.1316780110>
- 678 Reynolds V (2005) The chimpanzees of the Budongo forest: Ecology, behaviour and  
679 conservation. OUP Oxford
- 680 Rutz C, Webster MM (2021) *Ethology* adopts the STRANGE framework for animal  
681 behaviour research, to improve reporting standards. *Ethology* 127:99–101.  
682 <https://doi.org/10.1111/eth.13118>
- 683 Samuni L, Mundry R, Terkel J, et al (2014) Socially learned habituation to human observers  
684 in wild chimpanzees. *Anim Cogn* 17:997–1005. [https://doi.org/10.1007/s10071-014-](https://doi.org/10.1007/s10071-014-0731-6)  
685 0731-6
- 686 Smith TG, Sleno GA (1986) Do white whales, *Delphinapterus leucas*, carry surrogates in  
687 response to early loss of their young? *Can J Zool* 64:1581–1582.  
688 <https://doi.org/10.1139/z86-237>
- 689 Stanton MA, Lonsdorf EV, Pusey AE, Murray CM (2017) Do juveniles help or hinder?  
690 Influence of juvenile offspring on maternal behavior and reproductive outcomes in wild

- 691 chimpanzees (*Pan troglodytes*). *J Hum Evol* 111:152–162.  
692 <https://doi.org/10.1016/j.jhevol.2017.07.012>
- 693 Sugiyama Y, Kurita H, Matsui T, et al (2009) Carrying of dead infants by Japanese macaque  
694 (*Macaca fuscata*) mothers. *AS* 117:113–119. <https://doi.org/10.1537/ase.080919>
- 695 Takeshita RSC, Huffman MA, Kinoshita K, Bercovitch FB (2020) Changes in social  
696 behavior and fecal glucocorticoids in a Japanese macaque (*Macaca fuscata*) carrying her  
697 dead infant. *Primates* 61:35–40. <https://doi.org/10.1007/s10329-019-00753-w>
- 698 Thompson CL, Hrit R, Melo LCO, et al (2020) Callitrichid responses to dead and dying  
699 infants: the effects of paternal bonding and cause of death. *Primates* 61:707–716.  
700 <https://doi.org/10.1007/s10329-020-00824-3>
- 701 Tokuyama N, Moore DL, Graham KE, et al (2017) Cases of maternal cannibalism in wild  
702 bonobos (*Pan paniscus*) from two different field sites, Wamba and Kokolopori,  
703 Democratic Republic of the Congo. *Primates* 58:7–12. [https://doi.org/10.1007/s10329-](https://doi.org/10.1007/s10329-016-0582-7)  
704 [016-0582-7](https://doi.org/10.1007/s10329-016-0582-7)
- 705 Warren Y, Williamson EA (2004) Transport of dead infant mountain gorillas by mothers and  
706 unrelated females. *Zoo Biol* 23:375–378. <https://doi.org/10.1002/zoo.20001>
- 707 Watson CFI, Matsuzawa T (2018) Behaviour of nonhuman primate mothers toward their  
708 dead infants: uncovering mechanisms. *Phil Trans R Soc B* 373:20170261.  
709 <https://doi.org/10.1098/rstb.2017.0261>
- 710 Webster MM, Rutz C (2020) How STRANGE are your study animals? *Nature* 582:337–340.  
711 <https://doi.org/10.1038/d41586-020-01751-5>
- 712 Whiten A, Goodall J, McGrew WC, et al (1999) Cultures in chimpanzees. *Nature* 399:682–  
713 685. <https://doi.org/10.1038/21415>

714 Wilson ML, Boesch C, Fruth B, et al (2014) Lethal aggression in Pan is better explained by

715 adaptive strategies than human impacts. *Nature* 513:414–417.

716 <https://doi.org/10.1038/nature13727>

717
